# Supplementary material
Source: publisher figshare collection journal article supplement (https://karger.figshare.com/ndownloader/files/8716186)
Supplement: Supplementary file 1 [file 8716186]

| **First Author** | **Study Site** | **Age** | **Total** | | | **Male** | | | **Female** | | |
| --- | --- | --- | --- | --- | --- | --- | --- | --- | --- | --- | --- |
|  |  |  | **Cases** | **Population** | **Prevalence** | **Cases** | **Population** | **Prevalence** | **Cases** | **Population** | **Prevalence** |
| **Iran** | | | | | | | | | | | |
| Etemadifar et al [28](2006) | Isfahan | 10-19 | - | - | - | 14 | 538461 | 1 | 64 | 516129 | 1 |
|  |  | 20-29 | - | - | - | 82 | 347485 | 9.1 | 385 | 332470 | 9.3 |
|  |  | 30-39 | - | - | - | 134 | 268000 | 19.2 | 372 | 251521 | 11.9 |
|  |  | 40-49 | - | - | - | 55 | 172414 | 12.3 | 173 | 160334 | 8.7 |
|  |  | 50+ | - | - | - | 16 | 250000 | 2.5 | 46 | 232323 | 1.6 |
| Saadatnia et al [31] (2007) | Isfahan | 10-19 | 128 | 1054590 | 12.1 | 36 | 538461 | 6.68 | 92 | 516129 | 17.8 |
|  |  | 20-29 | 600 | 679928 | 88.2 | 104 | 347485 | 29.9 | 496 | 332470 | 149.2 |
|  |  | 30-39 | 624 | 519521 | 120 | 161 | 268000 | 60 | 463 | 251521 | 184 |
|  |  | 40-49 | 282 | 332748 | 84.7 | 67 | 172414 | 38.8 | 215 | 160334 | 134 |
|  |  | 50+ | 77 | 482232 | 15.9 | 20 | 250000 | 8 | 57 | 232323 | 24.5 |
|  |  | Total | 1718 | 3923255 | 43.8 | 338 | 2013492 | 19.2 | 1330 | 1909763 | 69.6 |
| Etemadifar et al [7](2011) | Isfahan | 0-4 | 1 | 313628 | - | 0 | 160860 | - | 1 | 152768 | - |
|  |  | 5-9 | 0 | 321305 | - | 0 | 164167 | - | 0 | 157138 | - |
|  |  | 10-14 | 7 | 372248 | - | 3 | 191040 | - | 4 | 181208 | - |
|  |  | 15-19 | 50 | 537163 | - | 6 | 274176 | - | 44 | 262987 | - |
|  |  | 20-24 | 307 | 600382 | - | 66 | 303161 | - | 241 | 297221 | - |
|  |  | 25-29 | 635 | 475977 | - | 129 | 243153 | - | 506 | 232824 | - |
|  |  | 30-34 | 677 | 372647 | - | 120 | 192822 | - | 557 | 179825 | - |
|  |  | 35-39 | 585 | 337658 | - | 139 | 175048 | - | 446 | 162610 | - |
|  |  | 40-44 | 465 | 288752 | - | 126 | 149043 | - | 339 | 139709 | - |
|  |  | 45-49 | 303 | 241921 | - | 79 | 124089 | - | 224 | 117832 | - |
|  |  | 50-54 | 179 | 194643 | - | 54 | 100264 | - | 125 | 94379 | - |
|  |  | 55-59 | 84 | 132906 | - | 24 | 67322 | - | 60 | 65584 | - |
|  |  | 60-64 | 35 | 106463 | - | 11 | 53163 | - | 24 | 53300 | - |
|  |  | 65-69 | 11 | 85247 | - | 5 | 44773 | - | 6 | 40474 | - |
|  |  | 70-74 | 5 | 80701 | - | 1 | 42699 | - | 4 | 38002 | - |
| **First Author** | **Study Site** | **Age** | **Total** | | | **Male** | | | **Female** | | |
|  |  |  | **Cases** | **Population** | **Prevalence** | **Cases** | **Population** | **Prevalence** | **Cases** | **Population** | **Prevalence** |
|  |  | 75-79 | 1 | 47947 | - | 1 | 24408 | - | 0 | 23539 | - |
|  |  | 80+ | 0 | 49668 | - | 0 | 25211 | - | 0 | 24457 | - |
|  |  | Total | 3345 | 4559256 | 73.74 | 764 | 2335399 | 32.7 | 2581 | 2223857 | 116.1 |
| Etemadifar et al [9] (2013) | Isfahan | 0-4 | 3 | 289022 | - | 0 | 146831 | - | 3 | 142191 | - |
|  |  | 5-9 | 1 | 309248 | - | 0 | 158079 | - | 1 | 151169 | - |
|  |  | 10-14 | 18 | 344620 | - | 5 | 175759 | - | 13 | 168861 | - |
|  |  | 15-19 | 156 | 495844 | - | 34 | 250902 | - | 122 | 244942 | - |
|  |  | 20-24 | 646 | 597646 | - | 121 | 296047 | - | 525 | 301599 | - |
|  |  | 25-29 | 1011 | 486262 | - | 194 | 241805 | - | 817 | 244457 | - |
|  |  | 30-34 | 862 | 371174 | - | 194 | 188031 | - | 668 | 183710 | - |
|  |  | 35-39 | 704 | 350408 | - | 164 | 178077 | - | 540 | 172331 | - |
|  |  | 40-44 | 523 | 314026 | - | 144 | 159759 | - | 379 | 154267 | - |
|  |  | 45-49 | 299 | 271304 | - | 70 | 138065 | - | 229 | 133231 | - |
|  |  | 50-54 | 167 | 220750 | - | 59 | 114327 | - | 108 | 106423 | - |
|  |  | 55-59 | 76 | 150688 | - | 17 | 79047 | - | 59 | 71641 | - |
|  |  | 60-64 | 24 | 113853 | - | 10 | 59758 | - | 14 | 54095 | - |
|  |  | 65-69 | 9 | 83005 | - | 3 | 44807 | - | 6 | 38198 | - |
|  |  | 70-74 | 3 | 71208 | - | 1 | 37506 | - | 2 | 33702 | - |
|  |  | 75+ | 1 | 86315 | - | 1 | 43145 | - | 0 | 43170 | - |
|  |  | Total | 4503 | 4555940 | 98.8 | 1017 | 2311945 | 44 | 3486 | 2243995 | 155.3 |
| **Jordan** |  |  |  |  |  |  |  |  |  |  |  |
| Najim al-Din et al [63] | Amman | 10-19 | 4 | - | - | 2 | - | - | 2 | - | - |
|  |  | 20-29 | 37 | - | - | 6 | - | - | 31 | - | - |
|  |  | 30-39 | 43 | - | - | 17 | - | - | 26 | - | - |
|  |  | 40-49 | 30 | - | - | 12 | - | - | 18 | - | - |
|  |  | 50-59 | 10 | - | - | 4 | - | - | 6 | - | - |
|  |  | 60+ | 2 | - | - | 2 | - | - | 0 | - | - |
|  |  | Total | 126 | - | - | 43 | - | - | 83 | - | - |
| **First Author** | **Study Site** | **Age** | **Total** | | | **Male** | | | **Female** | | |
|  |  |  | **Cases** | **Population** | **Prevalence** | **Cases** | **Population** | **Prevalence** | **Cases** | **Population** | **Prevalence** |
| El-Salem et al [61] | Amman | 0-14 | 32 | 130770 | 24 | 4 | 66810 | 6 | 28 | 63960 | 44 |
|  |  | 15-24 | 51 | 71740 | 71 | 16 | 36840 | 43 | 35 | 34900 | 100 |
|  |  | 25-34 | 49 | 55700 | 88 | 17 | 28150 | 60 | 32 | 27750 | 116 |
|  |  | 35-44 | 20 | 42100 | 48 | 5 | 21250 | 24 | 15 | 20850 | 72 |
|  |  | 45-54 | 4 | 22250 | 18 | 1 | 11040 | 91 | 3 | 11210 | 27 |
|  |  | 55+ | 0 | 80400 | 0 | 0 | 44050 | 0 | 0 | 40350 | 0 |
|  |  | Total | 156 | 402960 | 39 | 43 | 204140 | 21 | 113 | 198820 | 57 |
|  | Ibrid | 0-14 | 8 | 36550 | 22 | 0 | 18600 | 0 | 8 | 17950 | 45 |
|  |  | 15-24 | 14 | 11170 | 125 | 3 | 1070 | 280 | 11 | 10100 | 109 |
|  |  | 25-34 | 13 | 16930 | 77 | 2 | 8500 | 24 | 11 | 8430 | 130 |
|  |  | 35-44 | 3 | 12930 | 23 | 0 | 6470 | 0 | 3 | 6460 | 46 |
|  |  | 45-54 | 0 | 12070 | 0 | 0 | 6010 | 0 | 0 | 6060 | 0 |
|  |  | 55+ | 0 | 9790 | 0 | 0 | 4970 | 0 | 0 | 4820 | 0 |
|  |  | Total | 38 | 99440 | 38 | 5 | 45620 | 11 | 33 | 53820 | 61 |
| **Kuwait** | | | | | | | | | | | |
| Alroughani et al [56] | Kuwait | 0-19 | 36 | 524666 | 6.86 | 10 | 267909 | 3.73 | 26 | 256757 | 10.13 |
|  |  | 20-29 | 302 | 190364 | 158.64 | 127 | 96103 | 132.15 | 175 | 94261 | 185.65 |
|  |  | 30-39 | 281 | 138670 | 202.64 | 91 | 67205 | 135.41 | 190 | 71465 | 265.86 |
|  |  | 40-49 | 211 | 110786 | 190.46 | 71 | 52984 | 134.00 | 140 | 57802 | 242.21 |
|  |  | 50-59 | 81 | 69206 | 117.04 | 22 | 31323 | 70.24 | 59 | 37883 | 155.74 |
|  |  | 60+ | 16 | 56277 | 28.43 | 8 | 25436 | 31.45 | 8 | 30841 | 25.94 |
|  |  | Total | 927 | 1089969 | 85.05 | 329 | 540960 | 60.82 | 598 | 549009 | 108.92 |
| Alshubaili et al [46] | Kuwait | 10-19 | 47 | - | 14.21 | 17 | - | 10.01 | 30 | - | 18.66 |
|  |  | 20-29 | 158 | - | 36.24 | 70 | - | 26.79 | 88 | - | 50.38 |
|  |  | 30-39 | 92 | - | 16.76 | 36 | - | 9.77 | 56 | - | 31.05 |
|  |  | 40-49 | 24 | - | 7.49 | 14 | - | 6.33 | 10 | - | 10.08 |
|  |  | 50-59 | 5 | - | 4.08 | 1 | - | 1.20 | 4 | - | 10.11 |
|  |  | Total | 305 | - | 18.54 | 138 | - | 12.50 | 188 | - | 28.72 |
| **First Author** | **Study Site** | **Age** | **Total** | | | **Male** | | | **Female** | | |
|  |  |  | **Cases** | **Population** | **Prevalence** | **Cases** | **Population** | **Prevalence** | **Cases** | **Population** | **Prevalence** |
| **Qatar** | | | | | | | | | | | |
| Deleu et al [10] | Qatar | 13-19 | 5 | - | - | - | - | - | - | - | - |
|  |  | 20-29 | 48 | - | - | - | - | - | - | - | - |
|  |  | 30-39 | 53 | - | - | - | - | - | - | - | - |
|  |  | 40-49 | 35 | - | - | - | - | - | - | - | - |
|  |  | 50-59 | 13 | - | - | - | - | - | - | - | - |
|  |  | 60-65 | 0 | - | - | - | - | - | - | - | - |
| **United Arab Emirates** | | | | | | | | | | | |
| Inshasi et al [55] | Dubai | 16-28 | 84 | - | - | - | - | - | - | - | - |
|  |  | 29-35 | 87 | - | - | - | - | - | - | - | - |
|  |  | 36-42 | 53 | - | - | - | - | - | - | - | - |
|  |  | 43-74 | 60 | - | - | - | - | - | - | - | - |
